# Supplementary material for: A review of multistate modelling approaches in monitoring disease progression: Bayesian estimation using the Kolmogorov-Chapman forward equations
Source: PubMed Central journal article supplement (PMC7612622; doi:10.1177/0962280221997507), 2021-04-07
Supplement: EMS144247-supplement-Appendix.pdf [file EMS144247-supplement-Appendix.pdf]

174 **ZMZ** conceptualised the paper, cleaned and analysed the data and drafted the manuscript, **JT** and **TC**  
175 reviewed the manuscript for intellectual content, **EM** guided the whole paper structure development. All  
176 authors reviewed the final manuscript for submission.

## 177 **Conflict of Interest**

178 The authors declare no competing interests for this manuscript.

## 179 **Appendix 1: Statistical software and challenges**

180 In addition to the use of *msm* package in R which can handle maximum likelihood estimation (MLE)  
181 multistate models, the other library within R software is the *tdc.msm* library developed by Meira-Machado  
182 *et al.* (2009) which can fit five different multistate models including time-homogeneous and non-  
183 homogeneous Markov multistate models; and Cox Markov and Cox semi-Markov multistate models (1).  
184 The *tdc.msm* library is a comprehensive package for modelling multistate longitudinal data since different  
185 models can be fitted within one library, and model comparison can be done easily (1). For nonparametric  
186 estimation, the *msSurv* library within R can be used to estimate state occupation probabilities, initial and  
187 exiting time in a state, and the marginal integrated transition rate for the non-Markov multistate process  
188 (49). The other R package is the *mstate* developed by Wreede *et al.* (2011) for both the competing risk  
189 models and multistate models (50). Additional R libraries are the *etm* library Allignol *et al.* (2011) for  
190 empirical transition probabilities and the *changeLOS* (change length of hospital stay) library introduced by  
191 Wangler *et al.* 2006) for the Aalen-Johansen Estimator is implemented within R software. The limitation  
192 of the *changeLOS* library is that it does not support the inclusion of covariates in the multistate model and  
193 left truncated data (51). However, the *mvna* library can handle both left truncated and right censored  
194 multistate data (51).

195 The STATA software (licensed for use) (52) can fit the MLE multistate models using the *multistate model*  
196 *ado files* developed by Cowther and Lambert (2016) which restructures and declares the multistate data as  
197 survival and any survival model within STATA can be used (53). This package can estimate each transition  
198 rate by its unique model structure, assuming either a Markov or semi-Markov process (53). Uniquely to the  
199 STATA models is the ability to estimate each transition rate assuming different hazard functions which best  
200 fit the transition as compared to the R *msm* models which assumes the same hazard function on all the  
201 model transition processes. Another option in STATA is using *illdprep* and *stpm2illd* commands which can  
202 perform a similar analysis as described elsewhere (54).

203 The Bayesian estimation (BE) multistate models can be implemented in BayesX software using the  
204 *bayesreg* object. This package can handle several data features which the MLE cannot handle like non-  
205 linear effects of continuous covariates, time-varying effects, adjust for individual and spatial random effects  
206 accounting for unobserved heterogeneity. The WINBUGS software which estimates using Gibbs Sampling  
207 also can handle BE multistate model through the use of Kolmogorov-Chapman forward equations. This  
208 modelling approach promotes the use of partially observed aggregated data which the MLE approach  
209 cannot do as illustrated in the main text.

210 Most of these statistical packages which can handle multistate models, both from the MLE and BE are free  
211 while few may require licensing. Here we highlight a couple of strengths and limitations associated with  
212 each software type which handles multistate models, some of which might not have been discussed in detail  
213 in this manuscript. Firstly, most of the existing software assumes the Markov property and time-  
214 homogeneous by default which makes it difficult if these assumptions are violated. Secondly, the Markov  
215 assumption can be difficult to test, and in most cases, studies are silent on pre-model assumption testing of  
216 the Markov property; however, *markovchain* library implemented in R is one of the packages which can  
217 test for Markov property (26). Thirdly, not all software types are freely available for use like BayesX,

218 WinBUGS and R, some of the software types require a license to be granted access, for instance, STATA  
 219 and SAS. Fourthly, data argumentation (structure) is different in each of the software, which may be a major  
 220 drawback if one wishes to make a comparison across the software. In addition to this, at times convergence  
 221 is an issue in multistate models depending on the size of the data, the model complexity of the proposed  
 222 model (number of states, reversible transition and number of covariates included) and the preferred method  
 223 of estimation (BE or MLE) as the models may take much longer (hours or days) to converge or may fail to  
 224 converge at all. Lastly and most importantly, the result outputs vary moving from one software package to  
 225 another; hence, methodological background theory for each package is crucial to enable results comparison.  
 226 For instance, in the R *msm* library, one gets the exact transition rate values which can be interpreted directly  
 227 while in BayesX outputs, the estimates are based on the flexible predictor on a log scale (39).

## 228 **Appendix 2: WinBUGs three state reversible multistate model code**

```

229 ###MODEL
230 model {
231 #####Multinomial likelihood for observed data
232     for (i in 1:2)
233     {
234         r[i,1:3] ~ dmulti(P[i,1:3],n[i])
235     }
236 #####Find transition probabilities (for given time) in terms of rates
237
238 h<- sqrt(pow(lambda[1]-lambda[2], 2) + 4*G[1,2]*G[2,1])
239 e1<-exp(-.5*(lambda[1] + lambda[2] - h)*(2*t.obs))
240 e2<-exp(-.5*(lambda[1] + lambda[2] + h)*(2*t.obs))
241
242 P[1,1]<-((-lambda[1]+lambda[2]+h)*e1+ (lambda[1]-lambda[2]+h)*e2)/(2*h)
243 P[1,2]<-((-lambda[1]+lambda[2]+h)*(lambda[1]-lambda[2]+h)*(e1-e2))/(4*h*G[2,1]) P[1,3]<- 1- P[1,1] - P[1,2]
244 P[2,1]<- G[2,1]*(e1-e2)/h
245 P[2,2]<- ((lambda[1]-lambda[2]+h)*e1+ (-lambda[1] + lambda[2] + h)*e2)/(2*h)
246 P[2,3]<-1 - P[2,1] - P[2,2]
247
248 #Give exponential priors for unknown transition rate parameters
249     for (i in 1:2)
250     {
251         for (j in (i+1):3)
252         {
253             G[i,j] ~ dexp(.001)
254         }
255     }
256     for (i in 2:2)
257     {
258         for (j in 1:(i-1))
259         {
260             G[i,j] ~ dexp(.001)
261         }
262     }
263 lambda[1]<- G[1,2] + G[1,3]
264 lambda[2]<- G[2,1] + G[2,3]
265
266 #####Find P(t.new) for given new time of interest=1 years
267 e1.new<-exp(-.5*(lambda[1] + lambda[2] - h)*(2*t.new))

```

```

268 e2.new<-exp(-.5*(lambda[1] + lambda[2] + h)*(2*t.new))
269 Pt[1,1]<-((-lambda[1]+lambda[2]+h)*e1.new+ (lambda[1] -lambda[2]+h)*e2.new)/(2*h)
270 Pt[1,2]<-((-lambda[1]+lambda[2]+h)*(lambda[1]-lambda[2]+h)*(e1.new-e2.new))/(4*h*G[2,1])
271 Pt[1,3]<- 1-Pt[1,1] - Pt[1,2]
272 Pt[2,1]<- G[2,1]*(e1.new-e2.new)/h
273 Pt[2,2]<- ((lambda[1]-lambda[2]+h)*e1.new+ (-lambda[1] + lambda[2] + h)*e2.new)/(2*h)
274 Pt[2,3]<- 1-Pt[2,1] - Pt[2,2]
275 ##### P(t.final)=half a year (put 0.25 in the data)
276 e1.final<-exp(-.5*(lambda[1] + lambda[2] - h)*(2*t.final))
277 e2.final<-exp(-.5*(lambda[1] + lambda[2] + h)*(2*t.final))
278 Ptn[1,1]<-((-lambda[1]+lambda[2]+h)*e1.final+ (lambda[1] -lambda[2]+h)*e2.final)/(2*h)
279 Ptn[1,2]<-((-lambda[1]+lambda[2]+h)*(lambda[1]-lambda[2]+h)*(e1.final-e2.final))/(4*h*G[2,1])
280 Ptn[1,3]<-1 - Ptn[1,1] - Ptn[1,2]
281 Ptn[2,1]<- G[2,1]*(e1.final-e2.final)/h
282 Ptn[2,2]<- ((lambda[1]-lambda[2]+h)*e1.final+ (-lambda[1] + lambda[2] + h)*e2.final)/(2*h)
283 Ptn[2,3]<-1 - Ptn[2,1] - Ptn[2,2]
284 }
285 #####DATA
286 iist(r=structure(.Data=c(2269,143,78,137,2882,87),.Dim=c(2,3)),n=c(2490,3106),t.obs=0.5, t.new=0.25,
287 t.final=0.125)
288
289 #####INITIAL VALUES
290 list(G=structure(.Data=c(NA,.1,.1,.1,NA,.1),.Dim=c(2,3)))
291 Here is an R code for comparable results if one has individual-level data
292 #StepVL1-is the name of the dataset as saving name
293 #ID-is the unique identifier
294 #States-is the variable which defines individual states
295 #Time1-if the cumulative time
296 library(haven)
297 StepVL1 <- read_stata("C:/Users/ WinBUGS/VL_KOL_1.dta")
298 statetable.msm(States, ID, data=StepVL1)
299 twoway3.q <- rbind(c(0.25, 0.5, 0.25), c(0.25, 0.5, 0.25), c(0, 0, 0))
300 crudeinits.msm(States ~ Time1, ID, data=StepVL1, qmatrix=twoway3.q)
301 StepVL1.msm <- msm( States ~ Time1, subject=ID, data = StepVL1,
302 qmatrix = twoway3.q, deathexact = 3,
303 control = list (fnscale = 5000, maxit= 500 ))
304 #####To get the transition rates
305 StepVL1.msm
306 #####To get the transition probabilities
307 P_1year<-pmatrix.msm(StepVL1.msm,t=1)
308 P_6months<-pmatrix.msm(StepVL1.msm,t=0.5)
309 P_3months<-pmatrix.msm(StepVL1.msm,t=0.25)

```

## 311 REFERENCES

- 312 1. Meira-Machado L, Uña-álvarez J De, Cadarso-suárez C, Andersen PK. Multi-state models  
313 for the analysis of time-to-event data. *Statistical methods in Medical Research*.  
314 2009;18(2):195–222.
- 315 2. Hougaard P. Multi-state Models : A Review. *Lifetime Data Analysis*. 1999;264:239–64.
